# Supplementary material for: FUS regulates RAN translation through modulating the G-quadruplex structure of GGGGCC repeat RNA in C9orf72-linked ALS/FTD
Source: bioRxiv preprint, doi:10.1101/2022.11.01.514717, version 2 (2023-06-07)
Supplement: Figure 6-source data 1 [file 514717_file31.xlsx]

## Sheet: Figure 6—source data 1
Figure 6—source data 1. RNA-binding proteins and their cDNA accession numbers screened in the genetic analyses in Figure 6.
Protein	cDNA accession number
ESWR1	NM_005243.4
DDX3X	NM_001356.5
DDX5	NM_001320595.2
DDX17	NM_001098504.2
DHX9	NM_001357.5
DHX36	NM_020865.3
